# Supplementary material
Source: Springer Nature journal article supplement (https://www.springermedizin.de/resource/supplementary/12916_2007_123_MOESM3_ESM.pdf/9599218)

|                             | Cases | Controls |
|-----------------------------|-------|----------|
| XPD {AA}<br>IL10 {AA,AG}    | 115   | 146      |
| Other genotype combinations | 283   | 226      |

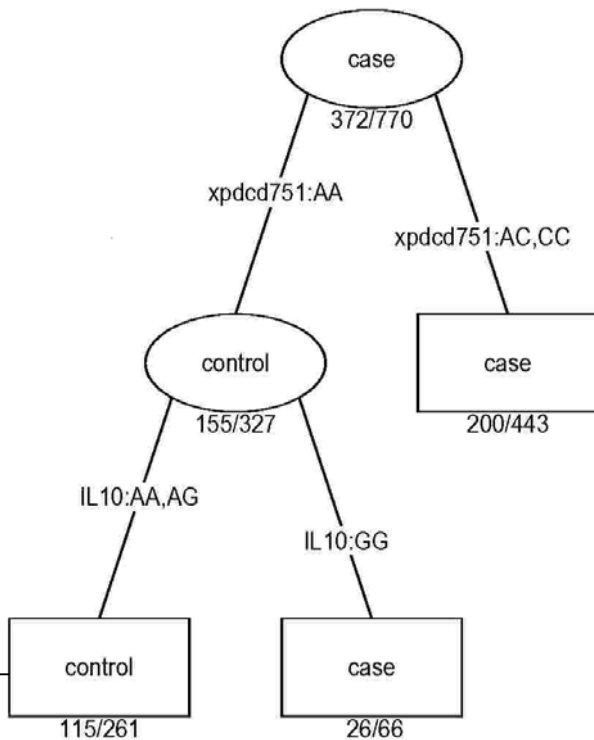

Supplement: MOESM3 [file 9599218]
